# Supplementary material
Source: PubMed Central journal article supplement (PMC8899602)
Supplement: mmc1.pdf [file mmc1.pdf]

YMTHE, Volume 30

## **Supplemental Information**

**A flexible split prime editor using  
truncated reverse transcriptase improves  
dual-AAV delivery in mouse liver**

**Chunwei Zheng, Shun-Qing Liang, Bin Liu, Pengpeng Liu, Suet-Yan Kwan, Scot A. Wolfe, and Wen Xue**

**Figure S1**

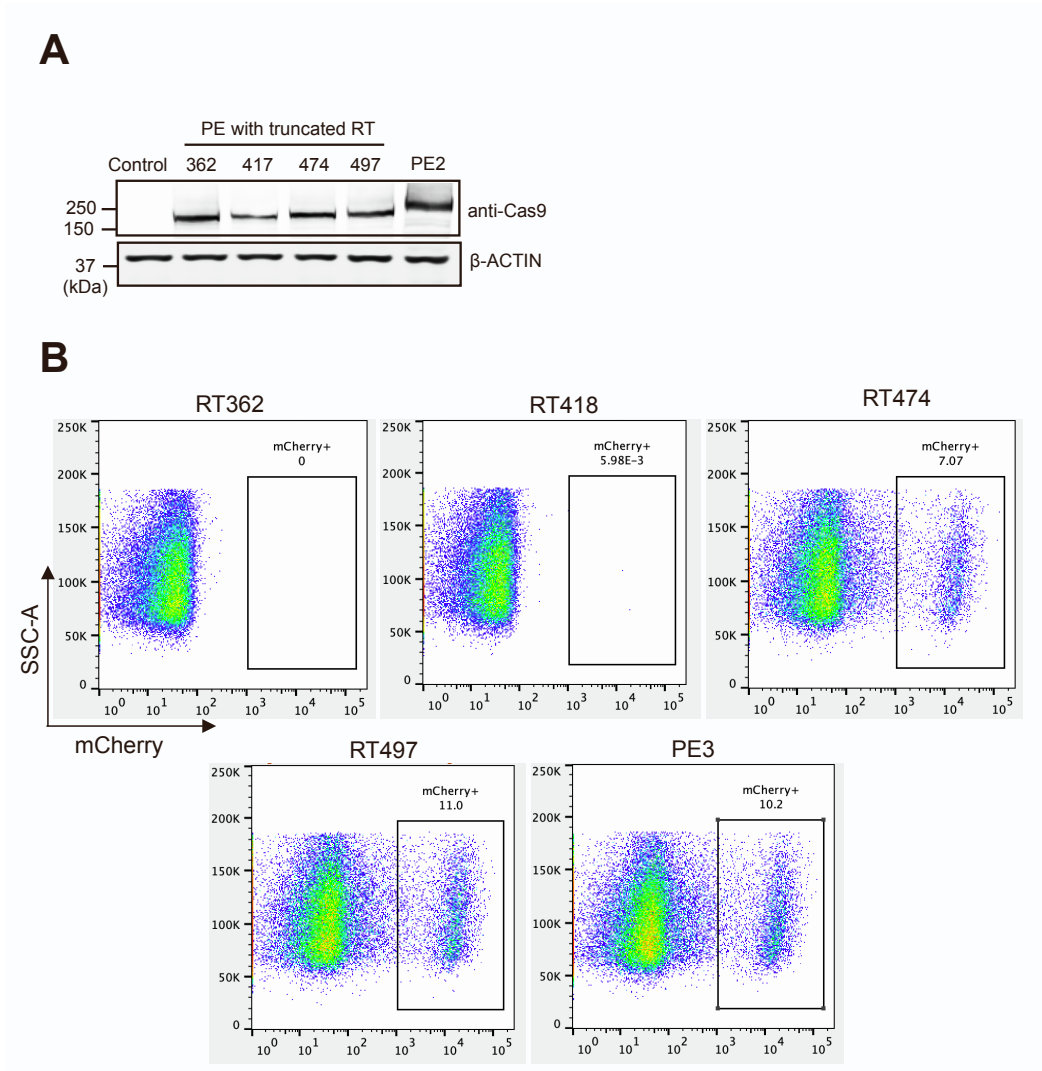

**Supplemental Figure 1: Flow cytometry analysis of editing efficiency of full-length PE2 and RT variants.**

**A** Western blot of full-length PE2 and compact PE2 variants. **B** Representative data of flow cytometry analysis of mCherry+ cells. The image data was analyzed by FlowJo 10.0 software. HEK293T cells were initially gated using FSC-A/SSC-A, then sorted for single cell using FSC-A/FSC-H. mCherry-positive cells were gated by SSC-A/Y2-A.

**Figure S2**

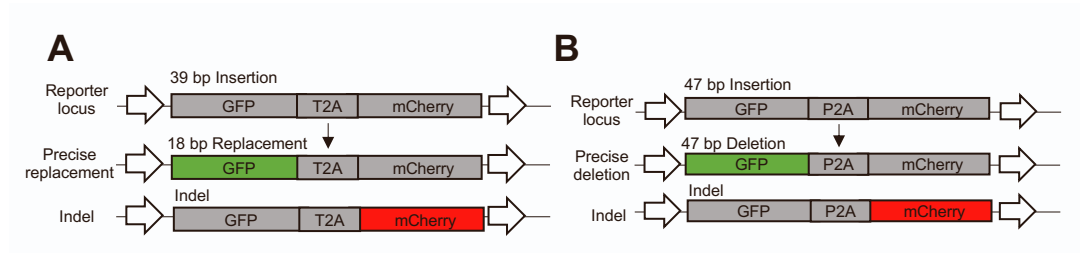

**Supplemental Figure 2 Editing frequencies of RT variants in TLR-MCV1 and TLR reporter lines.**

**A** Traffic light reporter multi-cas variant 1 (TLR-MCV1) cells containing a GFP with a 39-bp insertion, P2A, and out-of-frame mCherry. **B** TLR system containing a GFP with 47-bp insertion.

Figure S3

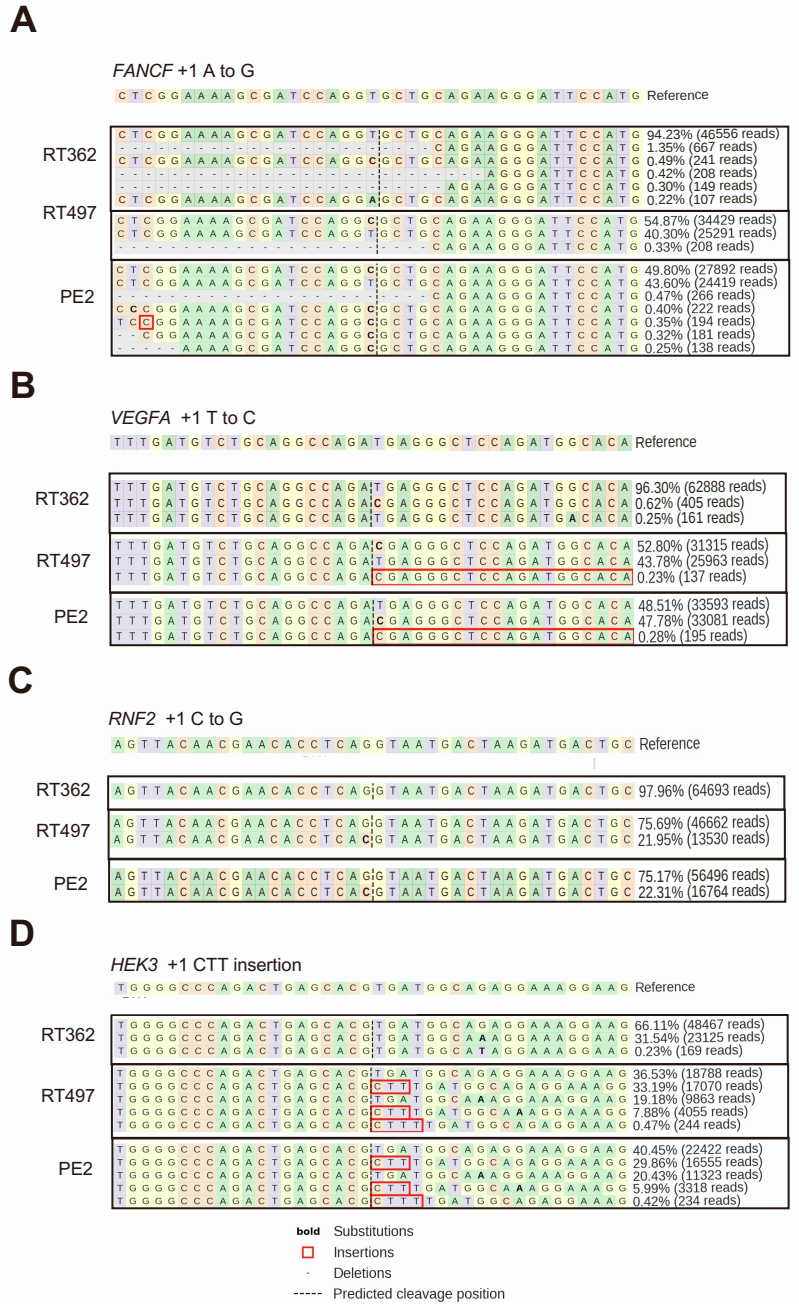

Supplemental Figure 3: Deep sequencing of endogenous loci.

A-D Allele frequencies and corresponding Illumina sequencing read counts are shown for each allele. All alleles observed with frequency  $\geq 0.2\%$  are shown.

Figure S4

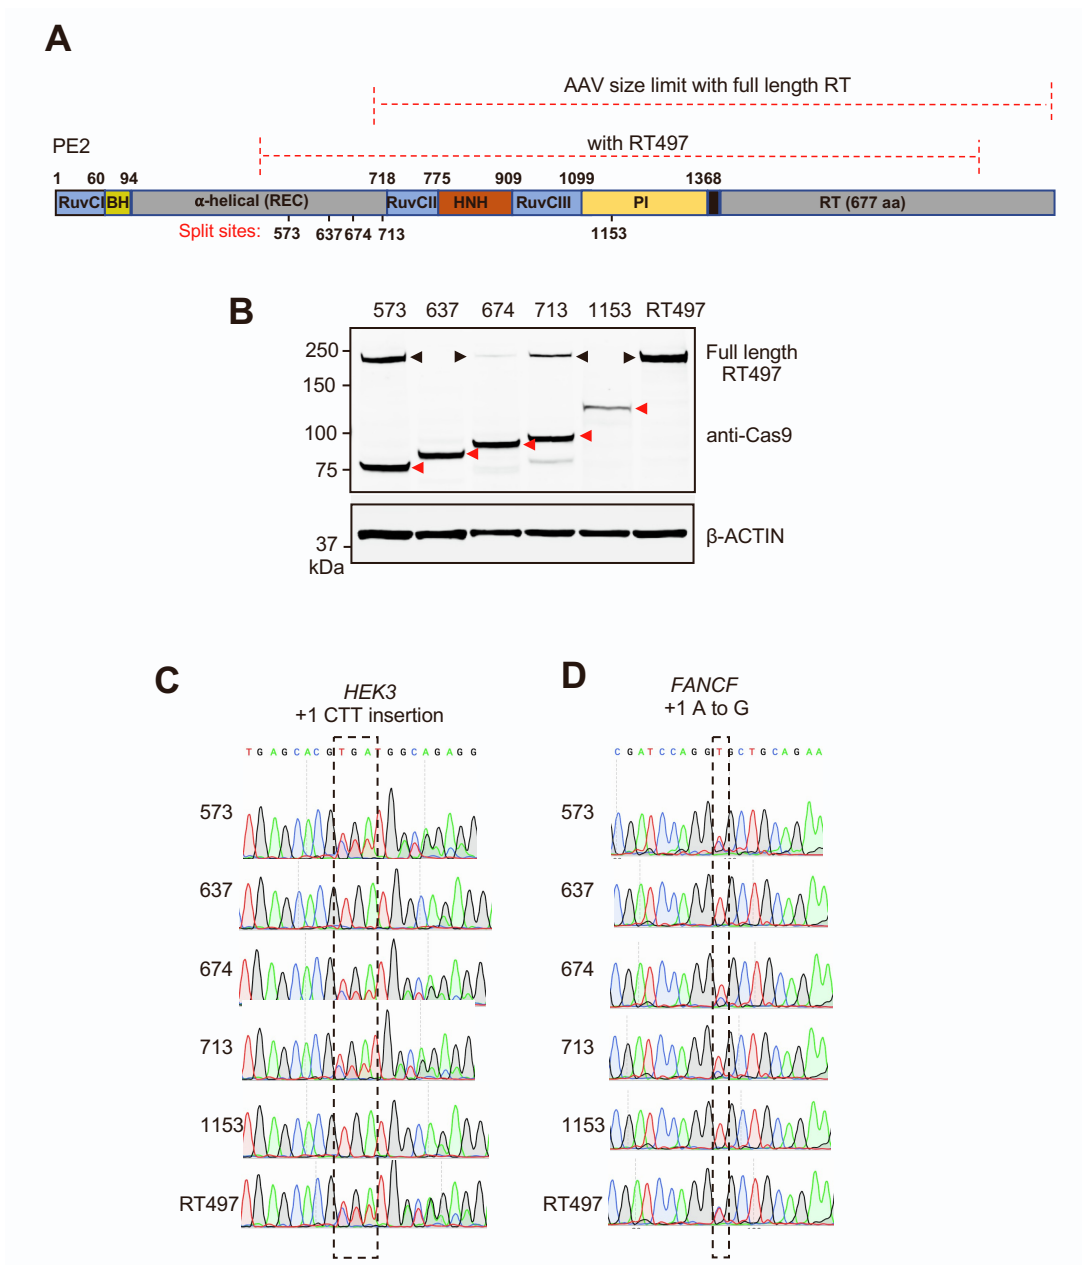

Supplemental Figure 4: Sanger sequencing of endogenous loci of split-cPE3 and RT497.

A Schematic representation of PE2 and RT497 split sites. AAV size limit is ~4.7 kb without ITR sequence. B Western blot showing split-cPE2 and unsplit RT497 expression. N-terminal

compact PE2 and C-terminal compact PE2 of each variant were co-transfected into HEK293T cells. As a positive control, unsplit RT497 plasmid was transfected. Cell lysates were probed with anti-GAPDH and anti-Cas9. Unspliced (red arrows) and reconstituted RT497 (black arrows) were detected using anti-Cas9 antibody.  $\beta$ -actin was used as a loading control. Unspliced and reconstituted RT497 were observed after transfection of split-cPE2-573, split-cPE2-674, and split-cPE2-713 (lanes 1,3,4). Only unspliced RT497 (red arrows) was detected after transfection of split-cPE2-637 and split-cPE2-1153 (lanes 2,5). **C-D** Sanger sequencing showed +1 CTT insertion at HEK3 locus **C** and +1 A to G transversion at *FANCF* locus. **D** Split-cPE2-573 supports robust editing efficiency at HEK3 and *FANCF* loci.

**Figure S5**

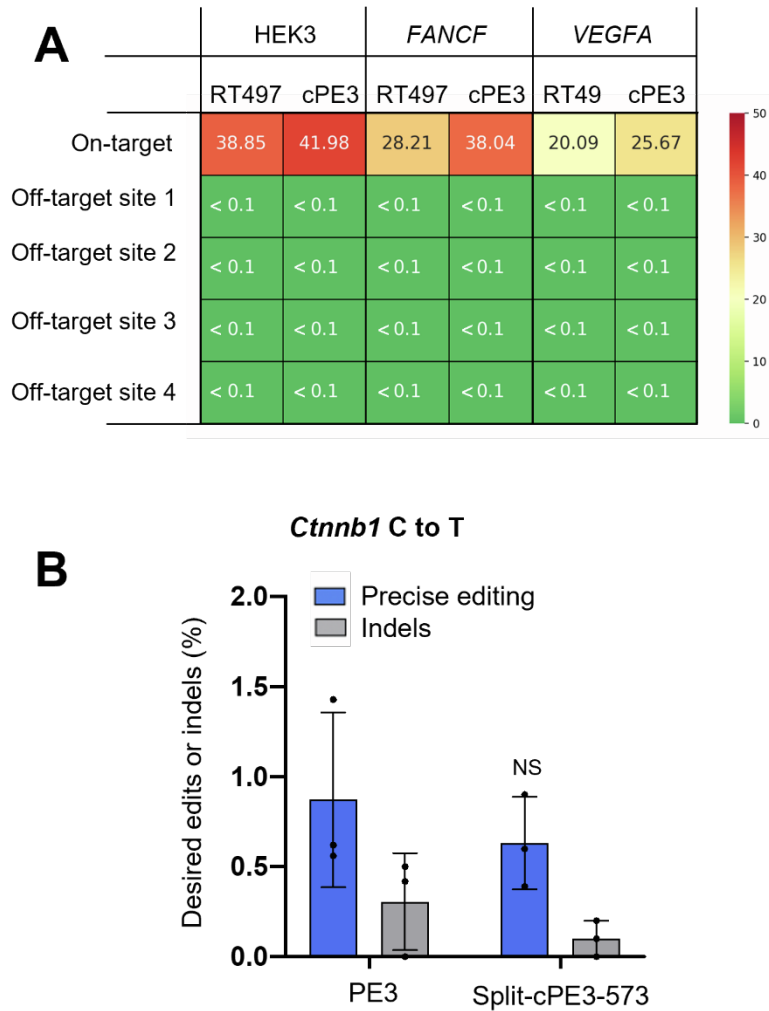

**Supplemental Figure 5: Comparison of prime editing and off-target editing by cPE3 and split-cPE3-573.**

**A** Average triplicate on-target and off-target editing efficiencies in HEK293T cells for cPE3 or split-cPE3-573 at known Cas9 off-target sites of HEK3, *FANCF* and *VEGFA* using deep sequencing. **B** Editing frequencies of C to T transversion in *Ctnnb1*. PE2 or split-cPE2-573, pegRNA and nicking sgRNA were delivered to the liver of FVB mice via hydrodynamic tail vein injection. Seven days after injection, livers were harvested, and the genomic DNA was sequenced. Mean  $\pm$  s.d. of n = 3 independent biological replicates.

**Supplementary Table 1.** Sequences of pegRNAs and sgRNAs used in this study. All sequences are shown in 5' to 3' orientation.

**Supplementary Table 2.** Sequences of primers used for cloning.

**Supplementary Table 3.** Sequences of primers used for genomic DNA amplification and high throughput sequencing.

**Supplementary Sequences:** Sequence of backbone plasmid used for prime editing

**Supplementary Table 1.** Sequences of pegRNAs and sgRNAs used in this study. All sequences are shown in 5' to 3' orientation.

sgRNA scaffold

GTTTTAGAGCTAGAAATAGCAAGTTAAAATAAGGCTAGTCCGTTATCAACTTGAAAA  
AGTGGGACCGAGTCGGTCC

| pegRNA                | spacer sequence (5'-3')      | 3' extension                                 | PB S (nt) | RT (nt) | Figure        |
|-----------------------|------------------------------|----------------------------------------------|-----------|---------|---------------|
| mCherry A to G        | CACCTTCA<br>GCTTGGCG<br>GTCT | TACGAGGGCACTCAA<br>ACCGCCAAGCTGAAG           | 14        | 16      | Figure 1C     |
| GFP-insertion         | AAGTTCA<br>GCGTGTCC<br>GGCTT | GTCAGCTTGCCGTAG<br>GTGGCATCGCCCTCG<br>CCTTCG | 13        | 36      | Figure 1D     |
| GFP-deletion          | GCGGAGA<br>GGGCACC<br>CCCGA  | GTTGGTCATGCGACC<br>CTGCTCGGGGGTGCC<br>CTCTCC | 14        | 22      | Figure 1E     |
| FANCF +1 A to G       | GGAATCC<br>CTTCTGCA<br>GCACC | GGAAAAGCGATCCAG<br>GCGCTGCAGAAGGGA<br>T      | 14        | 17      | Figure 2A, 3B |
| VEGFA +1 T to C       | GATGTCTG<br>CAGGCCA<br>GATGA | AATGTGCCATCTGGA<br>GCCCTCGTCTGGCCTG<br>CAGA  | 13        | 22      | Figure 2A     |
| RNF2 +1 C to G        | GTCATCTT<br>AGTCATTA<br>CCTG | AACGAACACCTCACG<br>TAATGACTAAGATG            | 15        | 14      | Figure 2A     |
| HEK3 +1 CTT insertion | GGCCCAG<br>ACTGAGC<br>ACGTGA | TCTGCCATCAAAGCG<br>TGCTCAGTCTG               | 13        | 13      | Figure 2A, 3B |
| HEK3 +1 T to          | GGCCCAG                      | TGGAGGAAGCAGGGC                              | 13        | 34      | Figure        |



|                        |                               |                                                         |    |    |              |
|------------------------|-------------------------------|---------------------------------------------------------|----|----|--------------|
| A                      | ACTGAGC<br>ACGTGA             | TTCCTTTCTCTGCCA<br>TCTCGTGCTCAGTCTG                     |    |    | 2B           |
| HEK3 +12 G<br>to C     | GGCCCAG<br>ACTGAGC<br>ACGTGA  | TGGAGGAAGCAGGGC<br>TTCCTTTGCTCTGCCA<br>TCACGTGCTCAGTCTG | 13 | 34 | Figure<br>2B |
| HEK3 +30 C<br>to G     | GGCCCAG<br>ACTGAGC<br>ACGTGA  | TGGACGAAGCAGGGC<br>TTCCTTTCTCTGCCA<br>TCACGTGCTCAGTCTG  | 13 | 34 | Figure<br>2B |
| Ctnnb1 C to T          | AGGGTTG<br>CCCTTGCC<br>ACTCA  | GCTCCTTTCTGAGTG<br>GCAAGGGCAA                           | 13 | 13 | Figure<br>3C |
| Pcsk9 TGA<br>insertion | GTTGCTGC<br>TACTGTGC<br>CCCAC | AGCGCCGGTTCAGGG<br>GCACAGTAGCA                          | 13 | 13 | Figure<br>4  |

| Nicking sgRNA         | spacer sequence (5'-3') | Figure        |
|-----------------------|-------------------------|---------------|
| mCherry A to G        | GCTGTCCCCTCAGTTCATGTA   | Figure 1C     |
| GFP-insertion         | GTAGGTCAGGGTGGTCACGA    | Figure 1D     |
| GFP-deletion          | GAGAAGCCGTAGCCCATCACG   | Figure 1E     |
| FANCF +1 A to G       | GGGGTCCCAGGTGCTGACGT    | Figure 2A, 3B |
| VEGFA +1 T to C       | GATGTACAGAGAGCCCAGGGC   | Figure 2A     |
| RNF2 +1 C to G        | GTCATCTTAGTCATTACCTG    | Figure 2A     |
| HEK3 +1 CTT insertion | GGCCCAGACTGAGCACGTGA    | Figure 2A, 3B |
| HEK3 +1 T to A        | GGCCCAGACTGAGCACGTGA    | Figure 2B     |
| HEK3 +12 G to C       | GGCCCAGACTGAGCACGTGA    | Figure 2B     |
| HEK3 +30 C to G       | GGCCCAGACTGAGCACGTGA    | Figure 2B     |
| Ctnnb1 C to T         | GAAAAGCTGCTGTCAGCCAC    | Figure 3C     |
| Pcsk9 TGA insertion   | GCCATCCTCTGGGACGGGA     | Figure 4      |

**Supplementary Table 2.** Sequences of primers used for cloning.

|                                  | F (5'-3')                                                  | R (5'-3')                                                      |
|----------------------------------|------------------------------------------------------------|----------------------------------------------------------------|
| RT362                            | CAGATTTGTCTGGCGGCTC<br>AAAAAGAACC                          | CCGCCAGACAAATCTGGCA<br>ACCCAGGG                                |
| RT418                            | TTGCCGTATCTGGCGGCTC<br>AAAAAGAACC                          | CCGCCAGATACGGCAATGG<br>CTGCTACC                                |
| RT474                            | TCGGACCGTCTGGCGGCTC<br>AAAAAGAACC                          | CCGCCAGACGGTCCGA<br>GGACCCGG                                   |
| RT497                            | GCCTTGATTCTGGCGGCTC<br>AAAAAGAACC                          | CCGCCAGAATCAAGGCAGT<br>TGTGTTGCA                               |
| N-terminal<br>Split-cPE2-<br>573 | TCGAGTCACCAAAGAAGA<br>AGCGGAAAGTCGACAAGA<br>AGTACAGCATCGGC | TGTCAGGATCTCTGTCTCGT<br>AGGACAGGCACTCGATTTT<br>CTTGAAGTAGTCCTC |
|                                  | TGCCTGTCCTACGAGACAG<br>A                                   | GCCGTCGGCGGTTCTTTT<br>AGCCGCCAGAATTAGGCAG                      |

|                                  |                                                            |                                                            |
|----------------------------------|------------------------------------------------------------|------------------------------------------------------------|
|                                  |                                                            | GTTATCCACTC                                                |
|                                  | TCTGGCGGCTCAAAAAGA<br>AC                                   | GACTTCCGCTTCTTCTTTG<br>G                                   |
| C-terminal<br>Split-cPE2-<br>573 | TTCGAGTCACCAAAGAAG<br>AAGCGGAAAGTCATGATC<br>AAGATTGCTACACG | CACGCCGGAGATTTCCACG<br>GAGTCGAAGCAATTGCTGG<br>CGATAAAGCCA  |
|                                  | TGCTTCGACTCCGTGGAA<br>T                                    | GCCGTCGGCGGTTCTTTTTG<br>AGCCGCCAGAATCAAGGCA<br>GTTGTGTTGCA |
|                                  | TCTGGCGGCTCAAAAAGA<br>AC                                   | GACTTCCGCTTCTTCTTTG<br>G                                   |
| N-terminal<br>Split-cPE2-<br>637 | TCGAGTCACCAAAGAAGA<br>AGCGGAAAGTCGACAAGA<br>AGTACAGCATCGGC | TGTCAGGATCTCTGTCTCGT<br>AGGACAGGCATTTAGCCG<br>TTCCTCGATCA  |
|                                  | TGCCTGTCCTACGAGACAG<br>A                                   | GCCGTCGGCGGTTCTTTTTG<br>AGCCGCCAGAATTAGGCAG<br>GTTATCCACTC |
|                                  | TCTGGCGGCTCAAAAAGA<br>AC                                   | GACTTCCGCTTCTTCTTTG<br>G                                   |
| C-terminal<br>Split-cPE2-<br>637 | TTCGAGTCACCAAAGAAG<br>AAGCGGAAAGTCATGATC<br>AAGATTGCTACACG | ATTGCTGGCGATAAAGCCA<br>T                                   |
|                                  | ACCTATGCCACCTGTTCG<br>A                                    | GCCGTCGGCGGTTCTTTTTG<br>AGCCGCCAGAATCAAGGCA<br>GTTGTGTTGCA |
|                                  | TCTGGCGGCTCAAAAAGA<br>AC                                   | GACTTCCGCTTCTTCTTTG<br>G                                   |
| N-terminal<br>Split-cPE2-<br>674 | TCGAGTCACCAAAGAAGA<br>AGCGGAAAGTCGACAAGA<br>AGTACAGCATCGGC | TGTCAGGATCTCTGTCTCGT<br>AGGACAGGCACTGCTTGTC<br>CCGGATGCCG  |
|                                  | TGCCTGTCCTACGAGACAG<br>A                                   | GCCGTCGGCGGTTCTTTTTG<br>AGCCGCCAGAATTAGGCAG<br>GTTATCCACTC |
|                                  | TCTGGCGGCTCAAAAAGA<br>AC                                   | GACTTCCGCTTCTTCTTTG<br>G                                   |
| C-terminal<br>Split-cPE2-<br>674 | TTCGAGTCACCAAAGAAG<br>AAGCGGAAAGTCATGATC<br>AAGATTGCTACACG | ATTGCTGGCGATAAAGCCA<br>T                                   |
|                                  | GCCCTGAAGAATGGCTTTA<br>TCGCCAGCAATTCCGGCA<br>AGACAATCCTGGA | GCCGTCGGCGGTTCTTTTTG<br>AGCCGCCAGAATCAAGGCA<br>GTTGTGTTGCA |
|                                  | TCTGGCGGCTCAAAAAGA<br>AC                                   | GACTTCCGCTTCTTCTTTG<br>G                                   |
| N-terminal<br>Split-cPE2-<br>713 | TCGAGTCACCAAAGAAGA<br>AGCGGAAAGTCGACAAGA<br>AGTACAGCATCGGC | TGTCAGGATCTCTGTCTCGT<br>AGGACAGGCACacctgggctttctg<br>gatgt |

|                                   |                                                            |                                                            |
|-----------------------------------|------------------------------------------------------------|------------------------------------------------------------|
|                                   | TGCCTGTCCTACGAGACAG<br>A                                   | GCCGTCGGCGGTTCTTTTTG<br>AGCCGCCAGAATTAGGCAG<br>GTTATCCACTC |
|                                   | TCTGGCGGCTCAAAAAGA<br>AC                                   | GACTTCCGCTTCTTCTTTG<br>G                                   |
| C-terminal<br>Split-cPE2-<br>713  | TTCGAGTCACCAAAGAAG<br>AAGCGGAAAGTCATGATC<br>AAGATTGCTACACG | ATTGCTGGCGATAAAGCCA<br>T                                   |
|                                   | GCCCTGAAGAATGGCTTTA<br>TCGCCAGCAATtccggccagggc<br>gatagcc  | GCCGTCGGCGGTTCTTTTTG<br>AGCCGCCAGAATCAAGGCA<br>GTTGTGTTGCA |
|                                   | TCTGGCGGCTCAAAAAGA<br>AC                                   | GACTTCCGCTTCTTCTTTG<br>G                                   |
| N-terminal<br>Split-cPE2-<br>1153 | TCGAGTCACCAAAGAAGA<br>AGCGGAAAGTCGACAAGA<br>AGTACAGCATCGGC | TGTCAGGATCTCTGTCTCGT<br>AGGACAGGCACTTGCCCTT<br>TTCCACTTTGG |
|                                   | TGCCTGTCCTACGAGACAG<br>A                                   | GCCGTCGGCGGTTCTTTTTG<br>AGCCGCCAGAATTAGGCAG<br>GTTATCCACTC |
|                                   | TCTGGCGGCTCAAAAAGA<br>AC                                   | GACTTCCGCTTCTTCTTTG<br>G                                   |
| C-terminal<br>Split-cPE2-<br>1153 | TTCGAGTCACCAAAGAAG<br>AAGCGGAAAGTCATGATC<br>AAGATTGCTACACG | ATTGCTGGCGATAAAGCCA<br>T                                   |
|                                   | CCCTGAAGAATGGCTTTAT<br>CGCCAGCAATTCCAAGAA<br>ACTGAAGAGTGTG | GCCGTCGGCGGTTCTTTTTG<br>AGCCGCCAGAATCAAGGCA<br>GTTGTGTTGCA |
|                                   | TCTGGCGGCTCAAAAAGA<br>AC                                   | GACTTCCGCTTCTTCTTTG<br>G                                   |

**Supplementary Table 3.** Sequences of primers used for genomic DNA amplification and high throughput sequencing.

| Gene               | F (5'-3')                                          | R (5'-3')                                          | Figure           |
|--------------------|----------------------------------------------------|----------------------------------------------------|------------------|
| FANCF<br>on-target | CTACACGACGCTCTTCCG<br>ATCTGATGGATGTGGCGC<br>AGGTAG | AGACGTGTGCTCTTCCGATC<br>TAGGCGTATCATTTTCGCGGA<br>T | Figure<br>2A, 3B |
| VEGFA<br>on-target | CTACACGACGCTCTTCCG<br>ATCTAAGCATCCCTGGAC<br>ACTTCC | AGACGTGTGCTCTTCCGATC<br>TTGGACCCCCTATTTCTGAC<br>CT | Figure<br>2A     |
| RNF2<br>on-target  | CTACACGACGCTCTTCCG<br>ATCTACCATAGCACTTCC<br>CTTCCA | AGACGTGTGCTCTTCCGATC<br>TTATCCCAGTTTACACGTCT<br>C  | Figure<br>2A     |
| HEK3               | CTACACGACGCTCTTCCG                                 | AGACGTGTGCTCTTCCGATC                               | Figure           |

|                               |                                                          |                                                        |               |
|-------------------------------|----------------------------------------------------------|--------------------------------------------------------|---------------|
| on-target                     | ATCTTGCTGCAAGTA<br>AGCATGCATTTG                          | TCTTCCAGCCCAGCCAAACT<br>T                              | 2A, 2B,<br>3B |
| HEK3<br>off-target site<br>1  | CTACACGACGCTCTTCCG<br>ATCTTCCCCTGTTGACCTG<br>GAGAA       | AGACGTGTGCTCTTCCGATC<br>TCACTGTACTTGCCCTGACC<br>A      | Figure<br>S5A |
| HEK3<br>off-target site<br>2  | CTACACGACGCTCTTCCG<br>ATCTTTGGTGTGACAGG<br>GAGCAA        | AGACGTGTGCTCTTCCGATC<br>TCTGAGATGTGGGCAGAAG<br>GG      | Figure<br>S5A |
| HEK3<br>off-target site<br>3  | CTACACGACGCTCTTCCG<br>ATCTTGAGAGGGAACAGA<br>AGGGCT       | AGACGTGTGCTCTTCCGATC<br>TGTCCAAAGGCCCAAGAAC<br>CT      | Figure<br>S5A |
| HEK3<br>off-target site<br>4  | CTACACGACGCTCTTCCG<br>ATCTTCCTAGCACTTTGG<br>AAGGTCG      | AGACGTGTGCTCTTCCGATC<br>TGCTCATCTTAATCTGCTCA<br>GCC    | Figure<br>S5A |
| FANCF<br>off-target site<br>1 | CTACACGACGCTCTTCCG<br>ATCTGCGGGCAGTGCCGT<br>CTTAGTCG     | AGACGTGTGCTCTTCCGATC<br>T<br>CTCCTTGCCGCCAGCCGGT<br>C  | Figure<br>S5A |
| FANCF<br>off-target site<br>2 | CTACACGACGCTCTTCCG<br>ATCTCCAGTGTTTCCCATC<br>CCCAACAC    | AGACGTGTGCTCTTCCGATC<br>TCAGGCCACAGGTCCTTCT<br>GGA     | Figure<br>S5A |
| FANCF<br>off-target site<br>3 | CTACACGACGCTCTTCCG<br>ATCT<br>CCCTGGGTTTGGTTGGCT<br>GCTC | AGACGTGTGCTCTTCCGATC<br>TCACTGGGGAAGAGGCGAG<br>GACAC   | Figure<br>S5A |
| FANCF<br>off-target site<br>4 | CTACACGACGCTCTTCCG<br>ATCTGAATGGATCCCCC<br>CTAGAGCTC     | AGACGTGTGCTCTTCCGATC<br>TGAAGACACAGAAATCACA<br>AACCGGC | Figure<br>S5A |
| VEGFA<br>off-target site<br>1 | CTACACGACGCTCTTCCG<br>ATCTGTTGCGATGGTTTC<br>ACTCCTG      | AGACGTGTGCTCTTCCGATC<br>TGCAGCGTCTCTGATGCGAT           | Figure<br>S5A |
| VEGFA<br>off-target site<br>2 | CTACACGACGCTCTTCCG<br>ATCTCCCTCATGCCCATG<br>AATTGTT      | AGACGTGTGCTCTTCCGATC<br>TTGGTGATCGCCTGCCATTT<br>C      | Figure<br>S5A |

|                               |                                                       |                                                   |               |
|-------------------------------|-------------------------------------------------------|---------------------------------------------------|---------------|
| VEGFA<br>off-target site<br>3 | CTACACGACGCTCTTCCG<br>ATCTCCCAAGATCATA<br>GCTCA       | AGACGTGTGCTCTTCCGATC<br>TAAGTACCATAGATTGGGTG<br>G | Figure<br>S5A |
| VEGFA<br>off-target site<br>4 | CTACACGACGCTCTTCCG<br>ATCT<br>CCATAGACTGGGTGGCTT<br>A | AGACGTGTGCTCTTCCGATC<br>T<br>GCCTTTGTGAATGGGATCA  | Figure<br>S5A |
| CTNNB1<br>on-target           | CTACACGACGCTCTTCCG<br>ATCTCCATGGAGCCGGAC<br>AGAAAA    | AGACGTGTGCTCTTCCGATC<br>TTGCGTGAAGGACTGGGAA<br>AA | Figure<br>S5B |

### Supplementary Sequences Sequence of backbone plasmid used for prime editing

Sequence of reverse transcriptase: **Finger-Palm domain (1-275 aa)** + **Thumb domain (276-361 aa)** + **Connection domain (362 - 496 aa)** + **RNase H domain (497-671 aa)**

TLNIEDEYRLHETSKEPDVSLGSTWLSDFPQAWAETGGMGLAVRQAPLIPLKATSTPVSI  
KQYPMSEARLGKPHIQRLDQGILVPCQSPWNTPLL PVKKPGTNDYRPVQDLREVNK  
RVEDIHPTVPNPYNLLSGLPSSHQWYTVLDLKDFAFFCLRLHPTSQPLFAFEWRDPEMGIS  
GQLTWTRL PQGFKNSPTLFNEALHRDLADFRIQHPDLILLQYVDDLLLAATSELDCQQG  
TRALLQTLGNLGYRASAKKAQICQKQVKYLG YLLKEGQRWLTEARKETVMGQPTPKT  
PRQLREFLGTAGFCRLWIPGFAEMAAPLYPLTKPGTLFNWGPDQQKAYQEIKQALLTAP  
ALGLPDLTKPFELFVDEKQGYAKGVL TQKLG PWRPVA YLSKKLDPVAAGWPPCLRM  
VAAIAVLTKDAGKLTMGQPLVILAPHA VEALVKQPPDRWLSNARMTHYQALLD TDR  
VQFGPVVALNPATLLPLPEEGLQHNC L DILAEAHGTRPDLTDQPLPADHTWYTDGSSL  
LQEGQRKAGAAVTTETEVIWAKALPAGTSAQRAELIALTQALKMAEGKKNVYTDSRY  
AFATAHIHGEIYRRRGWLTSEGKEIKNKDEILALLKALFLPKRLSIHCPGHQKGHSAEAR  
GNRMADQAARKAAITETPDTSTLL

Sequence of RT497: **cmv promoter** + **N-terminal NLS** + **Cas9 H840A** + **Flexible linker** + **M-MLV reverse transcriptase** + **C-terminal NLS** + **Plasmid backbone**

GACATTGATTATTGACTAGTTATTAATAGTAATCAATTACGGGGTCATTAGTTCATA  
GCCCATATATGGAGTTCGCGTTACATAACTTACGGTAAATGGCCCGCCTGGCTGAC  
CGCCCAACGACCCCGCCATTGACGTCAATAATGACGTATGTTCCCATAGTAACGC  
CAATAGGGACTTTCATTGACGTCAATGGGTGGAGTATTTACGGTAAACTGCCACT  
TGGCAGTACATCAAGTGTATCATATGCCAAGTACGCCCCCTATTGACGTCAATGACG  
GTAAATGGCCCGCCTGGCATTATGCCAGTACATGACCTTATGGGACTTTCCTACTT  
GGCAGTACATCTACGTATTAGTCATCGCTATTACCATGGTGATGCGGTTTTGGCAGT  
ACATCAATGGGCGTGGATAGCGGTTTACTCACGGGGATTCCAAGTCTCCACCCCA

TTGACGTCAATGGGAGTTTGT TTTGGCACCAAAATCAACGGGACTTTCCAAAATGTC  
GTAACAACCTCCGCCCATTTGACGCAAATGGGCGGTAGGCGTGTACGGTGGGAGGTC  
TATATAAGCAGAGCTGGTTTAGTGAACCGTCAGATCCGCTAGAGATCCGCGGCCGCT  
AATACGACTCACTATAGGGAGAGCCGCCACCATGAAACGGACAGCCGACGGAAGC  
GAGTTCGAGTCACCAAAGAAGAAGCGGAAAGTCGACAAGAAGTACAGCATCGGCCT  
GGACATCGGCACCAACTCTGTGGGCTGGGCCGTGATCACCGACGAGTACAAGGTGC  
CCAGCAAGAAATTCAAGGTGCTGGGCAACACCGACCGGCACAGCATCAAGAAGAA  
CCTGATCGGAGCCCTGCTGTTTCGACAGCGGCGAAACAGCCGAGGCCACCCGGCTGA  
AGAGAACCGCCAGAAGAAGATACACCAGACGGAAGAACCGGATCTGCTATCTGCA  
AGAGATCTTCAGCAACGAGATGGCCAAGGTGGACGACAGCTTCTTCCACAGACTGG  
AAGAGTCCTTCTGGTGGAAGAGGATAAGAAGCACGAGCGGCACCCCATCTTCGGC  
AACATCGTGGACGAGGTGGCCTACCACGAGAAGTACCCACCATCTACCACCTGAG  
AAAGAACTGGTGGACAGCACCGACAAGGCCGACCTGCGGCTGATCTATCTGGCCC  
TGGCCACATGATCAAGTTCCGGGGCCACTTCTGATCGAGGGCGACCTGAACCCCG  
ACAACAGCGACGTGGACAAGCTGTTTCATCCAGCTGGTGCAGACCTACAACCAGCTG  
TTCGAGGAAAACCCCATCAACGCCAGCGGCGTGGACGCCAAGGCCATCCTGTCTGC  
CAGACTGAGCAAGAGCAGACGGCTGGAAAATCTGATCGCCAGCTGCCCGGCGAGA  
AGAAGAATGGCCTGTTTCGGAAACCTGATTGCCCTGAGCCTGGGCCTGACCCCAACT  
TCAAGAGCAACTTCGACCTGGCCGAGGATGCCAACTGCAGCTGAGCAAGGACACC  
TACGACGACGACCTGGACAACCTGCTGGCCAGATCGGCGACCAAGTACGCCGACCT  
GTTTCTGGCCGCCAAGAACCTGTCCGACGCCATCCTGCTGAGCGACATCCTGAGAGT  
GAACACCGAGATCACCAAGGCCCCCTGAGCGCCTCTATGATCAAGAGATACGACG  
AGCACCAACAGGACCTGACCCTGCTGAAAGCTCTCGTGCGGCAGCAGCTGCCTGAG  
AAGTACAAAGAGATTTTCTTCGACCAGAGCAAGAACGGCTACGCCGGCTACATTGA  
CGGCGGAGCCAGCCAGGAAGAGTTCTACAAGTTCATCAAGCCCATCCTGGAAAAGA  
TGGACGGCACCGAGGAAGTCTCGTGAAGCTGAACAGAGAGGACCTGCTGCGGAAG  
CAGCGGACCTTCGACAACGGCAGCATCCCCACCAGATCCACCTGGGAGAGCTGCA  
CGCCATTCTGCGGCGGCAGGAAGATTTTTACCCATTCCTGAAGGACAACCGGGAAA  
AGATCGAGAAGATCCTGACCTTCCGCATCCCCTACTACGTGGGCCCTCTGGCCAGGG  
GAAACAGCAGATTCGCCTGGATGACCAGAAAGAGCGAGGAAACCATCACCCCTGG  
AACTTCGAGGAAGTGGTGGACAAGGGCGCTTCCGCCAGAGCTTCATCGAGCGGAT  
GACCAACTTCGATAAGAACCTGCCCAACGAGAAGGTGCTGCCAAGCACAGCCTGC  
TGTACGAGTACTTCACCGTGTATAACGAGCTGACCAAAGTGAAATACGTGACCGAG  
GGAATGAGAAAGCCCGCCTTCTGAGCGGCGAGCAGAAAAAGGCCATCGTGGACCT  
GCTGTTCAAGACCAACCGGAAAGTGACCGTGAAGCAGCTGAAAGAGGACTACTTCA  
AGAAAATCGAGTGCTTCGACTCCGTGGAAATCTCCGGCGTGGAAGATCGGTTCAAC  
GCCTCCCTGGGCACATAACCAGATCTGCTGAAAATTATCAAGGACAAGGACTTCCTG  
GACAAATGAGGAAAACGAGGACATTCTGGAAGATATCGTGCTGACCCTGACACTGTT  
TGAGGACAGAGAGATGATCGAGGAACGGCTGAAAACCTATGCCACCTGTTTCGACG  
ACAAAGTGATGAAGCAGCTGAAGCGGCGGAGATACACCGGCTGGGGCAGGCTGAG  
CCGGAAGCTGATCAACGGCATCCGGGACAAGCAGTCCGGCAAGACAATCCTGGATT  
TCCTGAAGTCCGACGGCTTCGCCAACAGAACTTCATGCAGCTGATCCACGACGAC  
AGCCTGACCTTTAAAGAGGACATCCAGAAAGCCCAGGTGTCCGGCCAGGGCGATAG  
CCTGCACGAGCACATTGCCAATCTGGCCGGCAGCCCCGCCATTAAGAAGGGCATCC  
TGCAGACAGTGAAGGTGGTGGACGAGCTCGTGAAAGTGATGGGCCGGCACAAGCCC  
GAGAACATCGTGATCGAAATGGCCAGAGAGAACCAGACCACCCAGAAGGGACAGA

AGAACAGCCGCGAGAGAATGAAGCGGATCGAAGAGGGCATCAAAGAGCTGGGCAG  
CCAGATCCTGAAAGAACACCCCGTGGAAAACACCAGCTGCAGAACGAGAAGCTGT  
ACCTGTACTACCTGCAGAATGGGCGGGATATGTACGTGGACCAGGAACTGGACATC  
AACCGGCTGTCCGACTACGATGTGGACGCTATCGTGCCTCAGAGCTTTCTGAAGGAC  
GACTCCATCGACAACAAGGTGCTGACCAGAAGCGACAAGAACCAGGGGCAAGAGCG  
ACAACGTGCCCTCCGAAGAGGTCGTGAAGAAGATGAAGAACTACTGGCGGCAGCTG  
CTGAACGCCAAGCTGATTACCCAGAGAAAGTTCGACAATCTGACCAAGGCCGAGAG  
AGGCGGCCTGAGCGAACTGGATAAGGCCGGCTTCATCAAGAGACAGCTGGTGGAAA  
CCCGGCAGATCACAAAGCACGTGGCACAGATCCTGGACTCCCGGATGAACACTAAG  
TACGACGAGAATGACAAGCTGATCCGGGAAGTGAAAGTGATCACCTGAAGTCCAA  
GCTGGTGTCCGATTTCCGGAAGGATTTCCAGTTTTACAAAGTGCGCGAGATCAACAA  
CTACCACCACGCCCACGACGCCTACCTGAACGCCGTCGTGGGAACCGCCCTGATCA  
AAAAGTACCCTAAGCTGGAAAGCGAGTTCGTGTACGGCGACTACAAGGTGTACGAC  
GTGCGGAAGATGATCGCCAAGAGCGAGCAGGAAATCGGCAAGGCTACCGCCAAGT  
ACTTCTTCTACAGCAACATCATGAACTTTTTCAAGACCGAGATTACCCTGGCCAACG  
GCGAGATCCGGAAGCGGCCTCTGATCGAGACAAACGGCGAAACCGGGGAGATCGT  
GTGGGATAAGGGCCGGGATTTTGCCACCGTGCAGAAAGTGCTGAGCATGCCCCAAG  
TGAATATCGTGAAAAAGACCGAGGTGCAGACAGGCCGGCTTCAGCAAAGAGTCTATC  
CTGCCCAAGAGGAACAGCGATAAGCTGATCGCCAGAAAGAAGGACTGGGACCCTA  
AGAAGTACGGCGGCTTCGACAGCCCCACCGTGGCCTATTCTGTGCTGGTGGTGGCCA  
AAGTGGAAGAGGGCAAGTCCAAGAACTGAAGAGTGTGAAAGAGCTGCTGGGGAT  
CACCATCATGGAAAGAAGCAGCTTCGAGAAGAATCCCATCGACTTTCTGGAAGCCA  
AGGGCTACAAAGAAGTGAAAAAGGACCTGATCATCAAGCTGCCTAAGTACTCCCTG  
TTCGAGCTGGAAAACGGCCGGAAGAGAATGCTGGCCTCTGCCGGCGAACTGCAGAA  
GGGAAACGAACTGGCCCTGCCCTCCAAATATGTGAACTTCTGTACCTGGCCAGCCA  
CTATGAGAAGCTGAAGGGCTCCCCGAGGATAATGAGCAGAAACAGCTGTTTGTGG  
AACAGCACAAGCACTACCTGGACGAGATCATCGAGCAGATCAGCGAGTTCTCCAAG  
AGAGTGATCCTGGCCGACGCTAATCTGGACAAAGTGCTGTCCGCCTACAACAAGCA  
CCGGGATAAGCCCATCAGAGAGCAGGCCGAGAATATCATCCACCTGTTTACCCTGA  
CCAATCTGGGAGCCCCTGCCGCCTTCAAGTACTTTGACACCACCATCGACCGGAAGA  
GGTACACCAGCACCAAGAGGGTGCTGGACGCCACCCTGATCCACCAGAGCATCACC  
GGCCTGTACGAGACACGGATCGACCTGTCTCAGCTGGGAGGTGACTCTGGAGGATC  
TAGCGGAGGATCCTCTGGCAGCGAGACACCAGGAACAAGCGAGTCAGCAACACCA  
GAGAGCAGTGGCGGCAGCAGCGGCGGCAGCAGCACCCCTAAATATAGAAGATGAGT  
ATCGGCTACATGAGACCTCAAAGAGCCAGATGTTTCTCTAGGGTCCACATGGCTGT  
CTGATTTTCTCAGGCCTGGGCGGAAACCGGGGGCATGGGACTGGCAGTTCGCCAA  
GCTCCTCTGATCATACTCTGAAAGCAACCTTACCCCGTGTCCATAAAACAATAC  
CCCATGTCACAAGAAGCCAGACTGGGGATCAAGCCCCACATACAGAGACTGTTGGA  
CCAGGGAATACTGGTACCCTGCCAGTCCCCCTGGAACACGCCCCTGCTACCCGTTAA  
GAAACCAGGGACTAATGATTATAGGCCTGTCCAGGATCTGAGAGAAGTCAACAAGC  
GGGTGGAAGACATCCACCCACCGTGCCCAACCCTTACAACCTCTTGAGCGGGCTCC  
CACCGTCCCACCAGTGGTACACTGTGCTTGATTTAAAGGATGCCTTTTTCTGCCTGAG  
ACTCCACCCACCAGTCAGCCTCTCTTCGCCTTTGAGTGGAGAGATCCAGAGATGGG  
AATCTCAGGACAATTGACCTGGACCAGACTCCCACAGGGTTTTCAAAAACAGTCCCA  
CCCTGTTTAAATGAGGCACTGCACAGAGACCTAGCAGACTTCCGGATCCAGCACCCA  
GACTTGATCCTGCTACAGTACGTGGATGACTTACTGCTGGCCGCCACTTCTGAGCTA

GACTGCCAACAAAGGTACTCGGGCCCTGTTACAAACCCTAGGGAACCTCGGGTATCG  
GGCCTCGGCCAAGAAAGCCCAAATTTGCCAGAAACAGGTCAAGTATCTGGGGTATC  
TTCTAAAAGAGGGTCAGAGATGGCTGACTGAGGCCAGAAAAGAGACTGTGATGGGG  
CAGCCTACTCCGAAGACCCCTCGACAATAAGGGAGTTCCTAGGGAAGGCAGGCTT  
CTGTGCGCTCTTCATCCCTGGGTTTGCAGAAATGGCAGCCCCCTGTACCCTCTCACC  
AAACCGGGGACTCTGTTTAATTGGGGCCAGACCAACAAAAGGCCTATCAAGAAAT  
CAAGCAAGCTCTTCTAACTGCCCCAGCCCTGGGGTTGCCAGATTTGACTAAGCCCTT  
TGAAGTCTTTGTCGACGAGAAGCAGGGCTACGCCAAAGGTGTCCTAACGCAAAAAC  
TGGGACCTTGGCGTTCGGCCGGTGGCCTACCTGTCCA AAAAGCTAGACCCAGTAGCA  
GCTGGGTGGCCCCCTTGCCTACGGATGGTAGCAGCCATTGCCGTACTGACAAAGGAT  
GCAGGCAAGCTAACCATGGGACAGCCACTAGTCATTCTGGCCCCCATGCAGTAGA  
GGCACTAGTCAAACAACCCCCGACCGCTGGCTTTC AACGCCCGGATGACTCACTA  
TCAGGCCTTGCTTTTGGACACGGACCGGGTCCAGTTCGGACCGGTGGTAGCCCTGAA  
CCCGGCTACGCTGCTCCCACTGCCTGAGGAAGGGCTGCAACACA ACTGCCTTGATTC  
TGGCGGCTCAAAAAGA ACCGCCGACGGCAGCGAATTCGAGCCCAAGAAGAAGAGG  
AAAGTCTAA CCGGTCATCATCACCATCACCATTGAGTTTAAACCCGCTGATCAGCCT  
CGACTGTGCCTTCTAGTTGCCAGCCATCTGTTGTTTGGCCCTCCCCCGTGCCTTCCTT  
GACCCTGGAAGGTGCCACTCCCACTGTCTTTTCTAATAAAAATGAGAAAATTGCATC  
GCATTGTCTGAGTAGGTGTCATTCTATTCTGGGGGGTGGGGTGGGGCAGGACAGCA  
AGGGGGAGGATTGGGAAGACAATAGCAGGCATGCTGGGGATGCGGTGGGCTCTATG  
GCTTCTGAGGCGGAAAGAACCAGCTGGGGCTCGATACCGTCGACCTCTAGCTAGAG  
CTTGGCGTAATCATGGTCATAGCTGTTTCTGTGTGAAATTGTTATCCGCTCACAATT  
CCACACAACATACGAGCCGGAAGCATAAAGTGTAAGCCTAGGGTGCCTAATGAGT  
GAGCTAACTCACATTAATTGCGTTGCGCTCACTGCCCGCTTTCAGTCGGGAAACCT  
GTCGTGCCAGCTGCATTAATGAATCGGCCAACGCGCGGGGAGAGGCGGTTTGCCTA  
TTGGGCGCTCTTCCGCTTCCTCGCTCACTGACTCGCTGCGCTCGGTCGTTCCGGCTGCG  
GCGAGCGGTATCAGCTCACTCAAAGGCGGTAATACGGTTATCCACAGAATCAGGGG  
ATAACGCAGGAAAGAACATGTGAGCAAAAAGGCCAGCAAAAAGGCCAGGAACCGTAA  
AAAGGCCGCGTTGCTGGCGTTTTTCCATAGGCTCCGCCCCCTGACGAGCATCACAA  
AAATCGACGCTCAAGTCAGAGGTGGCGAAACCCGACAGGACTATAAAGATACCAGG  
CGTTTCCCCCTGGAAGCTCCCTCGTGCGCTCTCCTGTTCCGACCCTGCCGCTTACCGG  
ATACCTGTCCGCTTTCTCCCTTCGGGAAGCGTGGCGCTTTCTCATAGCTCACGCTGT  
AGGTATCTCAGTTCGGTGTAGGTGCTTCGCTCCAAGCTGGGCTGTGTGCACGAACCC  
CCCGTTCAGCCCGACCGCTGCGCCTTATCCGGTAACTATCGTCTTGAGTCCAACCCG  
GTAAGACACGACTTATCGCCACTGGCAGCAGCCACTGGTAACAGGATTAGCAGAGC  
GAGGTATGTAGGCGGTGCTACAGAGTTCTTGAAGTGGTGGCCTAACTACGGCTACAC  
TAGAAGAACAGTATTTGGTATCTGCGCTCTGCTGAAGCCAGTTACCTTCGAAAAAAG  
AGTTGGTAGCTCTTGATCCGGCAAACAACCACCGCTGGTAGCGGTGGTTTTTTTTGT  
TTGCAAGCAGCAGATTACGCGCAGAAAAAAGGATCTCAAGAAGATCCTTTGATCT  
TTTCTACGGGGTCTGACACTCAGTGGAAACGAAA ACTCACGTTAAGGGATTTTGGTCA  
TGAGATTATCAAAAAGGATCTTCACCTAGATCCTTTTAAATTA AAAATGAAGTTTAA  
AATCAATCTAAAGTATATATGAGTAAACTTGGTCTGACAGTTACCAATGCTTAATCA  
GTGAGGCACCTATCTCAGCGATCTGTCTATTTTCGTTTCATCCATAGTTGCCTGACTCCC  
CGTCGTGTAGATAACTACGATACGGGAGGGCTTACCATCTGGCCCCAGTGCTGCAAT  
GATACCGCGAGACCCACGCTCACCGGCTCCAGATTTATCAGCAATAAACAGCCAG  
CCGGAAGGGCCGAGCGCAGAAGTGGTCCTGCAACTTTATCCGCTCCATCCAGTCTA



TTAATTGTTGCCGGGAAGCTAGAGTAAGTAGTTCGCCAGTTAATAGTTTTCGCGCAACG  
TTGTTGCCATTGCTACAGGCATCGTGGTGTACGCTCGTCGTTTGGTATGGCTTCATT  
CAGCTCCGGTCCCAACGATCAAGGCGAGTTACATGATCCCCATGTTGTGCAAAAA  
AGCGGTTAGCTCCTTCGGTCCTCCGATCGTTGTCAGAAGTAAGTTGGCCGCAGTGTT  
ATCACTCATGGTTATGGCAGCACTGCATAATTCTCTTACTGTCATGCCATCCGTAAG  
ATGCTTTTCTGTGACTGGTGAGTACTCAACCAAGTCATTCTGAGAATAGTGTATGCG  
GCGACCGAGTTGCTCTTGCCCGGCGTCAATACGGGATAATACCGCGCCACATAGCA  
GAACTTTAAAAGTGCTCATCATTGGAAAACGTTCTTCGGGGCGAAAACCTCTCAAGGA  
TCTTACCGCTGTTGAGATCCAGTTCGATGTAACCCACTCGTGCACCCAACTGATCTTC  
AGCATCTTTTACTTTCACCAGCGTTTCTGGGTGAGCAAAAACAGGAAGGCAAAATGC  
CGCAAAAAAGGGAATAAGGGCGACACGGAAATGTTGAATACTCATACTCTTCCTTTT  
TCAATATTATTGAAGCATTATCAGGGTTATTGTCTCATGAGCGGATACATATTTGA  
ATGTATTTAGAAAAATAAACAAATAGGGGTCCGCGCACATTTCCCCGAAAAGTGC  
CACCTGACGTCGACGGATCGGGAGATCGATCTCCCGATCCCCTAGGGTCTACTCTCA  
GTACAATCTGCTCTGATGCCGCATAGTTAAGCCAGTATCTGCTCCCTGCTTGTGTGTT  
GGAGGTCGCTGAGTAGTGCGCGAGCAAAATTTAAGCTACAACAAGGCAAGGCTTGA  
CCGACAATTGCATGAAGAATCTGCTTAGGGTTAGGCGTTTTGCGCTGCTTCGCGATG  
TACGGGCCAGATATACGCGTT

Backbone of pegRNA and Nicking sgRNA: U6 promoter + spCas9-sgRNA scaffold + Plasmid backbone

GTGGCACTTTTCGGGGAAATGTGCGCGGAACCCCTATTTGTTTATTTTTCTAAATACA  
TTCAAATATGTATCCGCTCATGAGACAATAACCCTGATAAATGCTTCAATAATATTG  
AAAAAGGAAGAGTATGAGTATTCAACATTTCCGTGTCGCCCTTATTCCCTTTTTTTCGCG  
GCATTTTGCCTTCTGTTTTTCTCACCCAGAAACGCTGGTGAAAGTAAAAGATGCT  
GAAGATCAGTTGGGTGCACGAGTGGGTACATCGAACTGGATCTCAACAGCGGTAA  
GATCCTTGAGAGTTTTTCGCCCCGAAGAACGTTTTCCAATGATGAGCACTTTTAAAGT  
TCTGCTATGTGGCGCGGTATTATCCCGTATTGACGCCGGGCAAGAGCAACTCGGTGCG  
CCGCATACACTATTCTCAGAATGACTTGGTTGAGTACTACCAGTACAGAAAAGCA  
TCTTACGGATGGCATGACAGTAAGAGAATTATGCAGTGCTGCCATAACCATGAGTG  
ATAACACTGCGGCCAACTTACTTCTGACAACGATCGGAGGACCGAAGGAGCTAACC  
GCTTTTTTGCACAACATGGGGGATCATGTAACCTCGCCTTGATCGTTGGGAACCGGAG  
CTGAATGAAGCCATACCAAACGACGAGCGTGACACCACGATGCCTGTAGCAATGGC  
ACAACGTTGCGCAAACCTATTAACCTGGCGAACTACTTACTCTAGCTTCCCGGCAACA  
ATTAATAGACTGGATGGAGGCGGATAAAGTTGCAGGACCACTTCTGCGCTCGGCCCT  
TCCGGCTGGCTGGTTTATTGCTGATAAATCTGGAGCCGGTGAGCGTGGGTCTCGCGG  
TATCATTGCAGCACTGGGGCCAGATGGTAAGCCCTCCCGTATCGTAGTTATCTACAC  
GACGGGGAGTCAGGCAACTATGGATGAACGAAATAGACAGATCGCTGAGATAGGTG  
CCTCACTGATTAAGCATTGGTAACTGTCAGACCAAGTTTACTCATATATACTTTAGAT  
TGATTTAAAACCTTCATTTTTTAATTTAAAAGGATCTAGGTGAAGATCCTTTTTTGATAAT  
CTCATGACCAAATCCCTTAACGTGAGTTTTTCGTTCCACTGAGCGTCAGACCCCGTA  
GAAAAGATCAAAGGATCTTCTTGAGATCCTTTTTTTTCTGCGCGTAATCTGCTGCTTGC  
AAACAAAAAAACCACCGCTACCAGCGGTGGTTTGGTTTTCGCGGATCAAGAGCTACCA  
ACTTTTTTCCGAAGGTAACCTGGCTTCAGCAGAGCGCAGATACCAAATACTGTCTT

CTAGTGTAGCCGTAGTTAGGCCACCACTTCAAGAACTCTGTAGCACCGCCTACATAC  
CTCGCTCTGCTAATCCTGTTACCAGTGGCTGCTGCCAGTGGCGATAAGTCGTGTCTTA  
CCGGGTTGGACTCAAGACGATAGTTACCGGATAAAGGCGCAGCGGTCTGGGCTGAACG  
GGGGTTCGTGCACACAGCCCAGCTTGGAGCGAACGACCTACACCGAACTGAGATA  
CCTACAGCGTGAGCTATGAGAAAGCGCCACGCTTCCCGAAGGGAGAAAGGCGGACA  
GGTATCCGGTAAGCGGCAGGGTTCGGAACAGGAGAGCGCACGAGGGAGCTTCCAGG  
GGGAAACGCCTGGTATCTTTATAGTCCTGTCTGGGTTTCGCCACCTCTGACTTGAGCG  
TCGATTTTTGTGATGCTCGTCAGGGGGGCGGAGCCTATGGAAAACGCCAGCAACG  
CGGCCTTTTTACGGTTCCTGGCCTTTTGTCTGGCCTTTTGTCTACATGTTCTTTCCTGCG  
TTATCCCCTGATTCTGTGGATAACCGTATTACCGCCTTTGAGTGAGCTGATACCGCTC  
GCCGCAGCCGAACGACCGAGCGCAGCGAGTCAGTGAGCGAGGAAGCGGAAGAGCG  
CCCAATACGCAAACCGCCTCTCCCCGCGGTTGGCCGATTCATTAATGCAGCTGGCA  
CGACAGGTTTCCCGACTGGAAAGCGGGCAGTGAGCGCAACGCAATTAATGTGAGTT  
AGCTCACTCATTAGGCACCCCAGGCTTTACACTTTATGCTTCCGGCTCGTATGTTGTG  
TGGAATTGTGAGCGGATAACAATTCACACAGGAAACAGCTATGACCATGATTACG  
CCAAGCGCGCAATTAACCCTCACTAAAGGGAACAAAAGCTGGAGCTCCACCGCGGT  
GGCGGCCGCCCCCTTACCAGGGCCTATTTCCCATGATTCCTTCATATTTGCATATA  
CGATACAAGGCTGTTAGAGAGATAATTGGAATTAATTTGACTGTAAACACAAAGAT  
ATTAGTACAAAATACGTGACGTAGAAAGTAATAATTTCTTGGGTAGTTTGCAGTTTT  
AAAATTATGTTTTAAATGGACTATCATATGCTTACCGTAACTTGAAAGTATTTCGA  
TTTCTTGGCTTTATATATCTTGTGGAAAGGACGAAACACCGGTGTGCAGGTGAGTGA  
TCCAAACGCCCGGCGGCAACCGAGCGTCTGAACAAATCCAGATGGAGTTCTGAGG  
TCATTACTGGATCTATCAACAGGAGTCCAAGCGAGCTCTCGAACCCAGAGTCCCGC  
TCAGAAGAACTCGTCAAGAAGGCGATAGAAGGCGATGCGCTGCGAATCGGGAGCG  
GCGATACCGTAAAGCACGAGGAAGCGGTCAGCCCATTTCGCCCAAGCTCTTCAGC  
AATATCACGGGTAGCCAACGCTATGTCCTGATAGCGGTCCGCCACACCCAGCCGGC  
CACAGTCGATGAATCCAGAAAAGCGGCCATTTTCCACCATGATATTCGGCAAGCAG  
GCATCGCCATGGGTACGACGAGATCCTCGCCGTCGGGCATGCGCGCCTTGAGCCTG  
GCGAACAGTTCGGCTGGCGCGAGCCCCTGATGCTCTTCGTCCAGATCATCCTGATCG  
ACAAGACCGGCTTCCATCCGAGTACGTGCTCGCTCGATGCGATGTTTCGCTTGGTGG  
TCGAATGGGCAGGTAGCCGGATCAAGCGTATGCAGCCGCCGATTGCATCAGCCAT  
GATGGATACTTTCTCGGCAGGAGCAAGGTGAGATGACAGGAGATCCTGCCCCGGCA  
CTTCGCCCAATAGCAGCCAGTCCCTTCCCGCTTCAGTGACAACGTGAGCACAGCTG  
CGCAAGGAACGCCCGTCGTGGCCAGCCACGATAGCCGCGCTGCCTCGTCTGTCAGTT  
CATTAGGGCACCGGACAGGTTCGGTCTTGACAAAAGAACCAGGGCGCCCCTGCGCT  
GACAGCCGGAACACGGCGGCATCAGAGCAGCCGATTGTCTGTTGTGCCAGTCATA  
GCCGAATAGCCTCTCCACCCAAGCGGCCGGAGAACCCTGCGTGCAATCCATCTTGTT  
AATCATGCGAAACGATCCTCATCTGTCTCTTGATCAGATCTTGATCCCCTGCGCCAT  
CAGATCCTTGGCGGCAAGAAAGCCATCCAGTTTACTTTGCAGGGCTTCCCAACCTTA  
CCAGAGGGCGCCCCAGCTGGCAATTCCGACGGATCAAGAACCCTGCTGACGTTTTAG  
AGCTAGAAATAGCAAGTTAAAATAAGGCTAGTCCGTTATCAACTTGAAAAAGTGGG  
ACCGAGTCGGTCCTTTTTTTTGAATTGATATCAAGCTTATCGATACCGTCGACCTCGA  
GGGGGGGCCCGGTACCCAATTGCCCCTATAGTGAGTCGTATTACGCGCGCTCACTGG  
CCGTCGTTTTACAACGTCGTGACTGGGAAAACCCTGGCGTTACCCAACCTTAATCGCC  
TTGCAGCACATCCCCCTTTCGCCAGCTGGCGTAATAGCGAAGAGGCCCGCACCGATC  
GCCCTTCCCAACAGTTGCGCAGCCTGAATGGCGAATGGGACGCGCCCTGTAGCGGC

GCATTAAGCGCGGGCGGGTGTGGTGGTTACGCGCAGCGTGACCGCTACACTTGCCAG  
CGCCCTAGCGCCCGCTCCTTTCGCTTTCCTCCCTTCCTTCTCGCCACGTTTCGCCGGCT  
TTCCCCGTCAAGCTCTAAATCGGGGGCTCCCTTTAGGGTTCGATTTAGTGCTTTACG  
GCACCTCGACCCCAAAAACTTGATTAGGGTGATGGTTCACGTAGTGGGCCATCGCC  
CTGATAGACGGTTTTTCGCCCTTTGACGTTGGAGTCCACGTTCTTTAATAGTGGACTC  
TTGTTCCAAACTGGAACAACACTCAACCCTATCTCGGTCTATTCTTTTGATTTATAAG  
GGATTTTGCCGATTTTCGGCCTATTGGTTAAAAAATGAGCTGATTTAACAAAAATTTA  
ACGCGAATTTTAACAAAATATTAACGCTTACAATTTAG
